# Supplementary material for: Optimization of Personalized Contrast Agent Injection Protocols Based on High Heart Rate: A Study Aimed at Enhancing Coronary CTA Image Quality
Source: Research Square preprint supplement (doi:10.21203/rs.3.rs-8579047/v1), 2026-02-24
Supplement: Supplementary file 1 [file 9d5bb53c6b8fe7a7f16dd44a.docx]

Supplementary analysis

CT attenuation and CNR measurements for the superior vena cava (SVC) and right atrium (RA) are summarized in Supplementary Table 5. No statistically significant differences were detected among groups (P > 0.05), confirming that the increased flow rate and contrast volume in the improved P3T protocol did not cause excessive enhancement or venous artifacts.

Supplementary Table 5. CT attenuation and CNR values of the SVC and RA across the three groups.

| Anatomical structure | | Primary Cohort | | Validation Cohort (≥90 bpm) | P-value |
| --- | --- | --- | --- | --- | --- |
| Low HR (<90 bpm) | High HR (≥90 bpm) |
| CT value | SVC | 120.6 (107.6–135.0) | 118.4 (109.0–127.6) | 120.8 (113.9–128.2) | P>0.05 |
| RA | 118.6 (97.2–133.3) | 110.7 (100.0–123.0) | 116.4 (107.5–122.8) | P>0.05 |
| CNR value | SVC | 2.02 (1.54–2.72) | 2.02 (1.55–2.33) | 1.95 (1.62–2.39) | P>0.05 |
| RA | 2.11 (1.49–2.74) | 2.12 (1.54–2.53) | 1.96 (1.70–2.30) | P>0.05 |

Note: SVC = superior vena cava, RA = right atrium, CT value=Computed Tomography Value, CNR=contrast-to-noise ratio,SNR=Signal-to-Noise Ratio. P<0.05 indicated statistically significant difference.
